# Supplementary material
Source: PubMed Central journal article supplement (PMC8272885)
Supplement: NIHMS1716984-supplement-Supplementary_Data_File_S1.pdf [file NIHMS1716984-supplement-Supplementary_Data_File_S1.pdf]

**Table S1. The clinical information of patients with VaD and healthy controls**

|                          | ID        | gender | age | Primary diagnosis | Secondary diagnosis | Evidence for vascular insults                                                                                                       | Tangles | Plaques |
|--------------------------|-----------|--------|-----|-------------------|---------------------|-------------------------------------------------------------------------------------------------------------------------------------|---------|---------|
| <b>Control</b>           | Control-1 | Male   | 74  | No-brain disease  | -                   | No                                                                                                                                  | No      | No      |
|                          | Control-2 | Male   | 78  | No-brain disease  | -                   | No                                                                                                                                  | No      | No      |
|                          | Control-3 | Female | 61  | No-brain disease  | -                   | No                                                                                                                                  | No      | No      |
|                          | Control-4 | Male   | 84  | No-brain disease  | -                   | No                                                                                                                                  | No      | No      |
|                          | Control-5 | Male   | 79  | No-brain disease  | -                   | No                                                                                                                                  | No      | No      |
|                          | Control-6 | Male   | 86  | No-brain disease  | -                   | No                                                                                                                                  | No      | No      |
|                          | Control-7 | Female | 88  | No-brain disease  | -                   | No                                                                                                                                  | No      | No      |
|                          | Control-8 | Male   | 96  | No-brain disease  | -                   | No                                                                                                                                  | No      | No      |
| <b>Vascular Dementia</b> | VaD-1     | Female | 77  | (Braak 0)         | -                   | Lacunary and collumary infarctions; Moderate atherosclerosis of the large cerebral arteries.                                        | No      | No      |
|                          | VaD-2     | Female | 71  | (Braak 1)         | -                   | Severe atherosclerosis of the large basal cerebral vessels; Hyalino-fibrotic necrotising vasculopathy with perivascular infiltrates | No      | Slight  |
|                          | VaD-3     | Male   | 65  | (Braak 0)         | -                   | Moderate subcortical infarction                                                                                                     | No      | No      |
|                          | VaD-4     | Female | 61  | (Braak 1)         | -                   | Severe atherosclerosis of the cerebral arteries; Vascular encephalopathy, diffuse.                                                  | No      | No      |
|                          | VaD-5     | Male   | 64  | (Braak 0)         | -                   | Severe atherosclerosis of the large cerebral arteries; severe agonal ischemic changes.                                              | Few     | No      |
|                          | VaD-6     | Male   | 50  | (Braak 0)         | -                   | Many vessels with perivascular lymphatic infiltrate; Several vessels are densely fibrotic                                           | No      | No      |
|                          | VaD-7     | Male   | 60  | (Braak 2)         | -                   | The ventricular system shows severe dilation; Vessels with perivascular lymphocytic infiltrate                                      | No      | Slight  |
|                          | VaD-8     | Male   | 57  | (Braak 0)         | -                   | Large cerebral arteries with bilateral infarctions; Focally small ischemic defects.                                                 | No      | No      |
|                          | VaD-9     | Female | 65  | (Braak 1)         | -                   | Lacunar infarction; some vascular deviances                                                                                         | No      | No      |
