# Supplementary material
Source: PubMed Central journal article supplement (PMC8272885)
Supplement: NIHMS1716984-supplement-Supplementary_Data_File_S2.pdf [file NIHMS1716984-supplement-Supplementary_Data_File_S2.pdf]

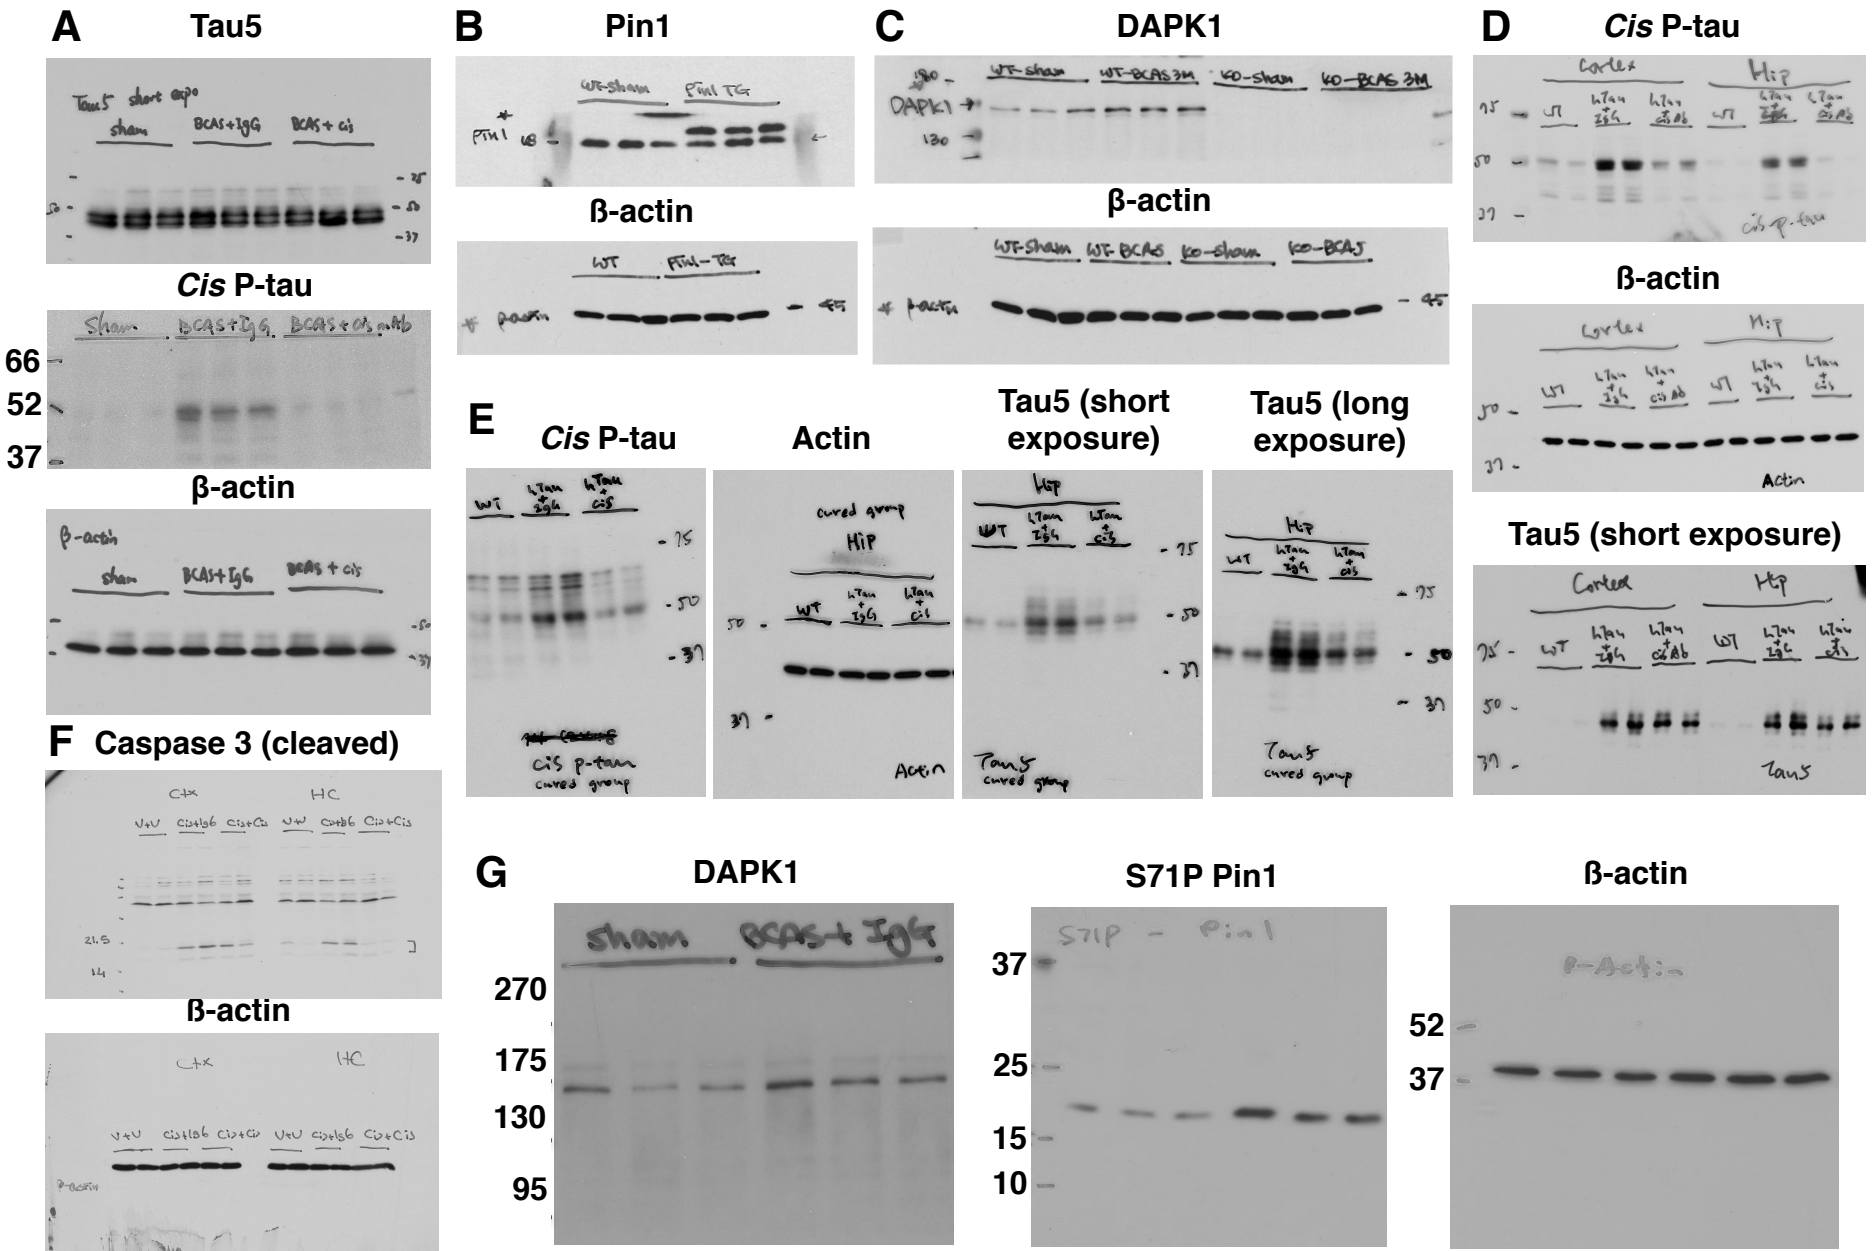

**Data file S2. Uncropped Western blot images. (A-G)** Uncropped western blot images for Fig. 2C (A), Fig. 3D (B), fig. S8B (C), Fig. 4D (D), fig. S10D (E), fig. S16A (F) and fig. S7D (G).
